# Supplementary material for: The Beta Subunit of Non-bifurcating NADH-Dependent [FeFe]-Hydrogenases Differs From Those of Multimeric Electron-Bifurcating [FeFe]-Hydrogenases
Source: PubMed Central journal article supplement (PMC7311640; doi:10.3389/fmicb.2020.01109), 2020-06-17

## Supplementary Figures for

### The Beta Subunit of Non-Bifurcating NADH-Dependent [FeFe]-Hydrogenases Differ from Those of Multimeric Electron-Bifurcating [FeFe]-Hydrogenases

Nathaniel A. Losey, Saroj Poudel, Eric S. Boyd, and Michael J. McInerney

**Supplementary Figure S1. SDS-PAGE Gel of Recombinant *S. aciditrophicus* HydAB Purified from *E. coli*.** Lane 1, molecular weight markers; Lane 2, *E. coli* cell-free extract; Lane 3, HydAB fraction. Molecular weights listed on gel image were predicted from the encoding gene sequence.

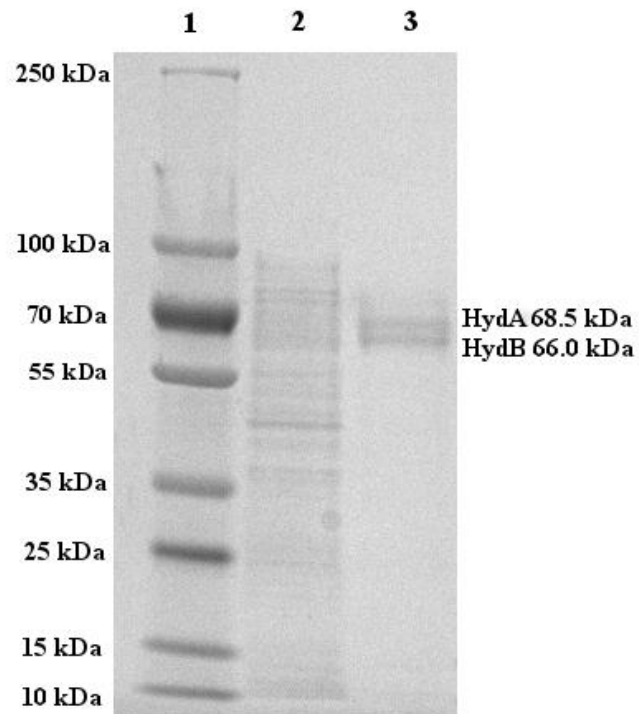

**Supplementary Figure S2. Native PAGE Analysis of Recombinant *S. aciditrophicus* HydAB Purified from *E. coli*.** Lane 1, molecular weight markers; Lane 2, *E. coli* cell-free extract; Lane 3, HydAB fraction.

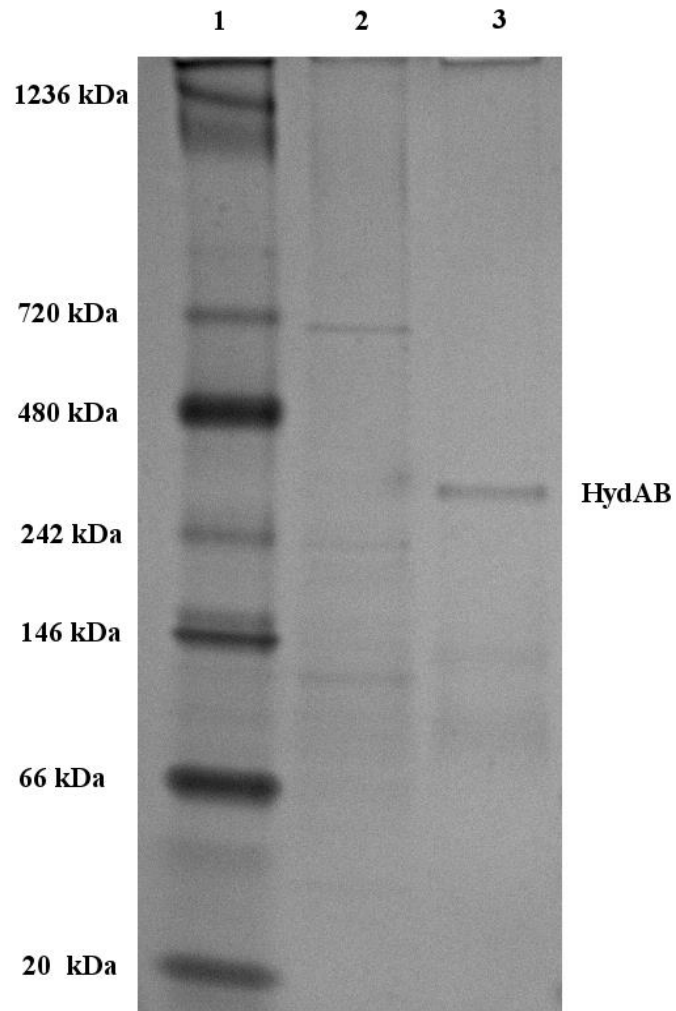

**Supplementary Figure S3. SDS-PAGE of Recombinantly Produced *S. aciditrophicus* Ferredoxin from *E. coli* and Ferredoxin Partially Purified from *S. aciditrophicus*. Lane 1. molecular weight markers; Lane 2. nickel affinity purified recombinant SYN\_03059 gene product; Lane 3. partially purified ferredoxin fraction from *S. aciditrophicus* cells.**

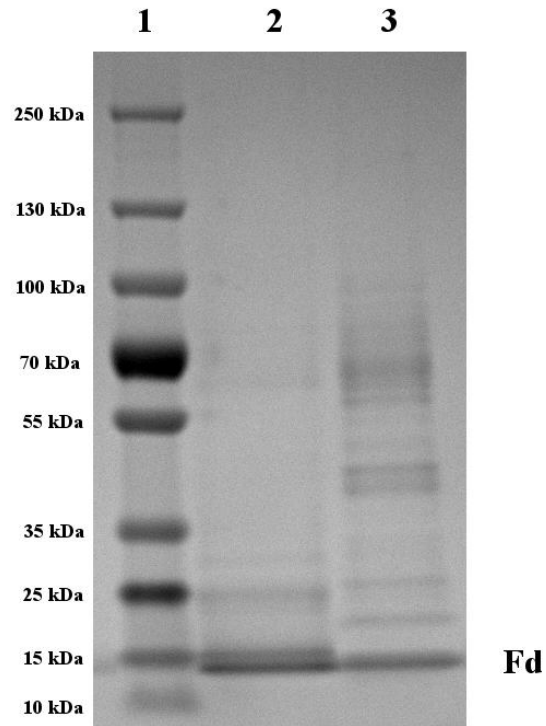

**Supplementary Figure S4. Production of Hydrogen from NADH by HydAB in the Presence of Reduced Ferredoxin-Generating System.** The reduced ferredoxin-generating system and HydAB (25.4  $\mu\text{g}$ ) were added as indicated by  $\text{Fd}_{\text{red}}$  and  $+\text{HydAB}$ , respectively. NADH was added as indicated by  $+\text{NADH}$ . The maximal rate of hydrogen production was  $24.6 \text{ nanomoles} \cdot \text{min}^{-1} \cdot \text{mg}^{-1}$ .

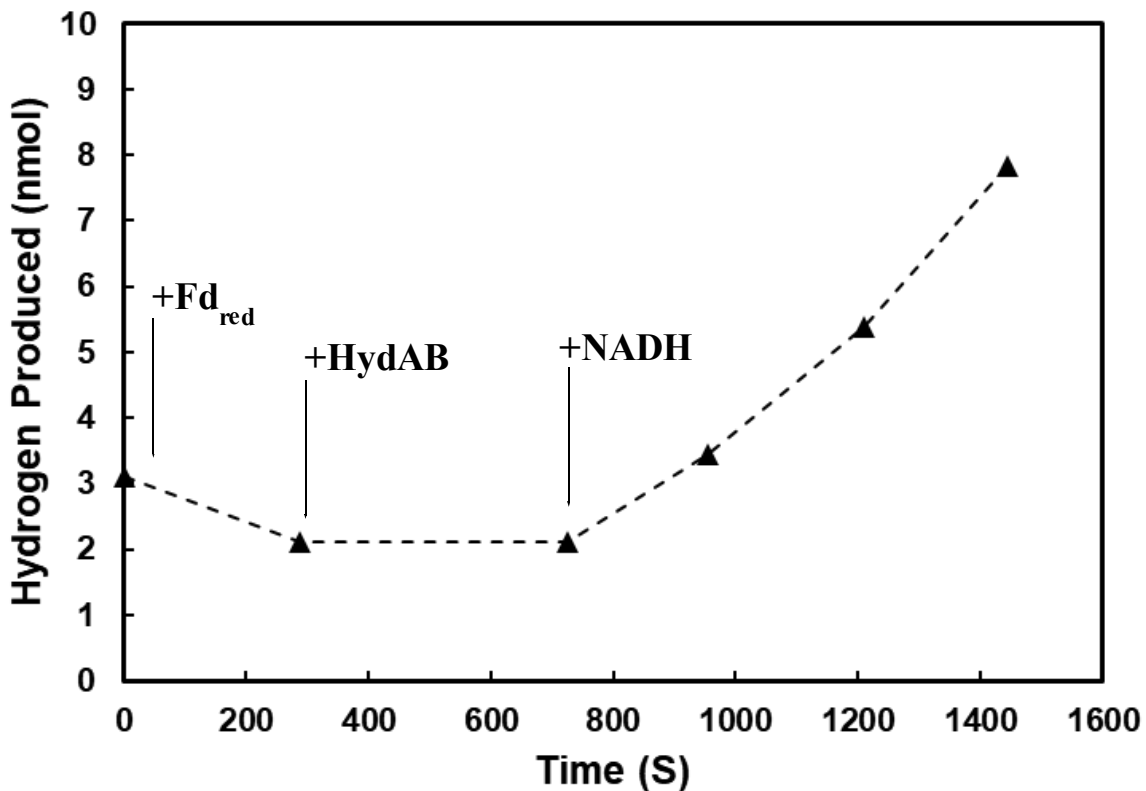

**Supplementary Figure S5. Hydrogen Partial Pressures During the Metabolism of Crotonate, Cyclohex-1-ene-1-Carboxylate, and Benzoate By Pure Cultures of *S. aciditrophicus* and Co-Cultures of *S. aciditrophicus* with *Methanospirillum hungatei*.** Panels A, B and C: hydrogen and substrate concentrations for metabolism of crotonate (A), cyclohex-1-ene carboxylate (B), and benzoate (C) by pure cultures of *S. aciditrophicus*. Panels D, E, and F: hydrogen and substrate concentrations during the metabolism of crotonate (D), cyclohex-1-ene carboxylate (E), and benzoate (F) by co-cultures of *S. aciditrophicus* with *M. hungatei*. (A)  $97.8 \pm 9.8$  nmol, (B)  $127.5 \pm 6.9$  nmol, (C)  $72.2 \pm 9.8$  nmol, (D)  $57.4 \pm 9.1$  nmol, (E)  $56.8 \pm 7.3$  nmol, (F)  $46.9 \pm 28.8$  nmol.

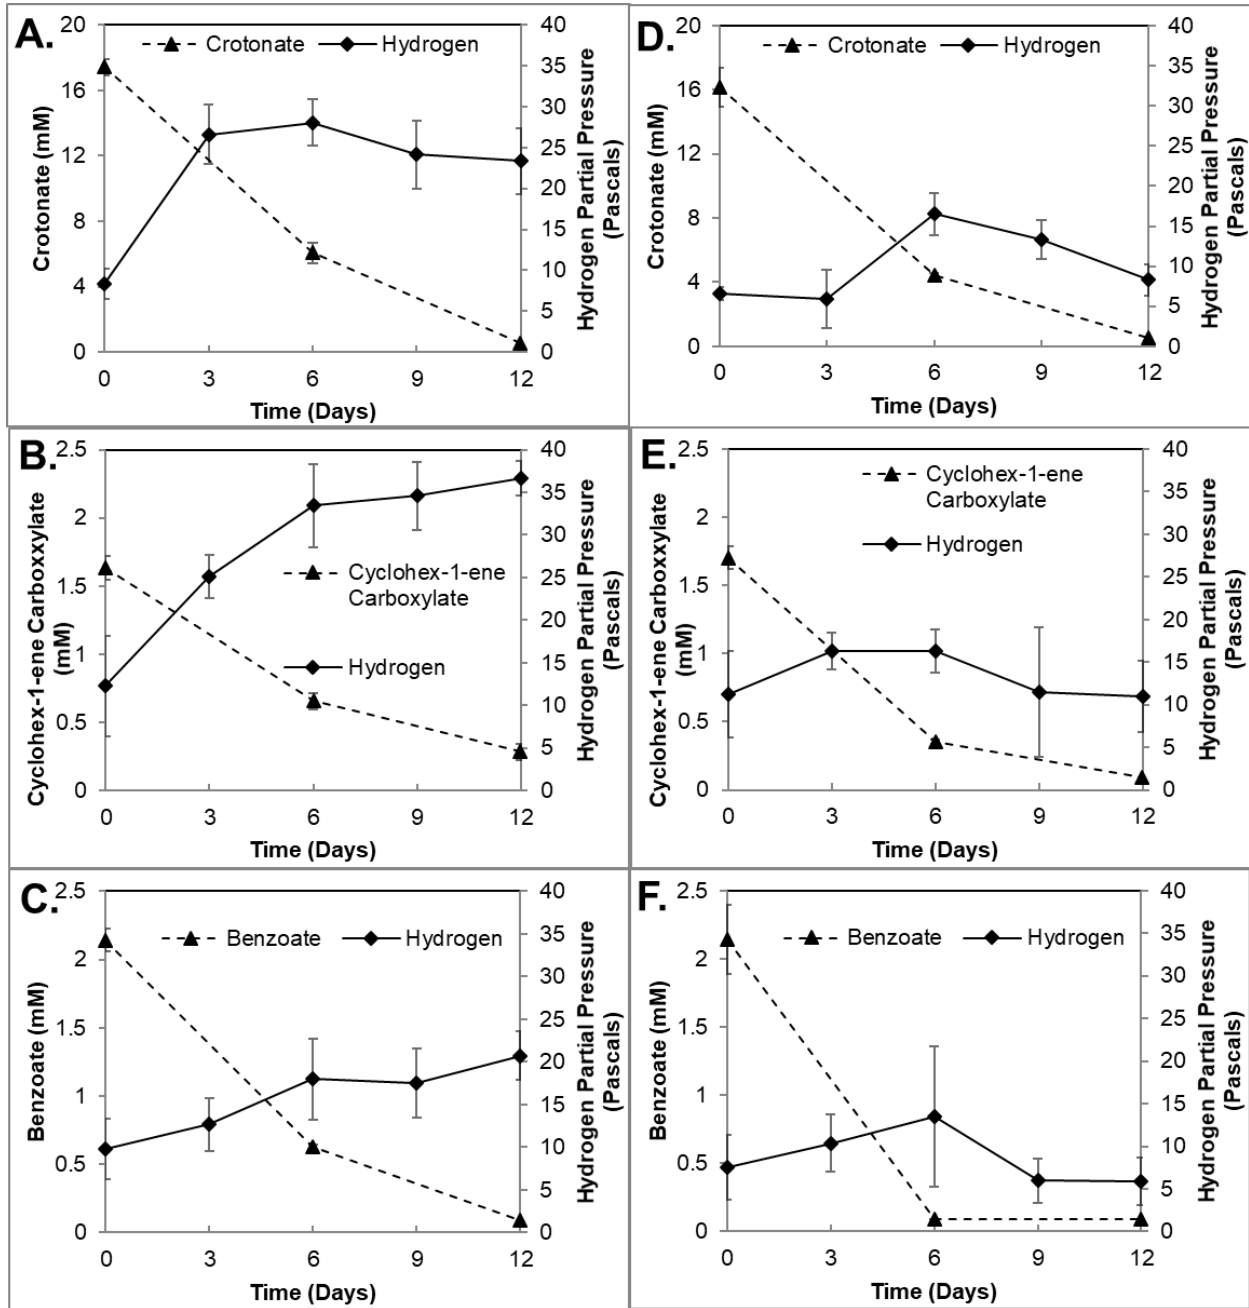

Supplement: Data_Sheet_3.pdf [file Data_Sheet_3.pdf]
