# Supplementary material for: The Beta Subunit of Non-bifurcating NADH-Dependent [FeFe]-Hydrogenases Differs From Those of Multimeric Electron-Bifurcating [FeFe]-Hydrogenases
Source: PubMed Central journal article supplement (PMC7311640; doi:10.3389/fmicb.2020.01109), 2020-06-17
Supplement: Data_Sheet_1.pdf [file Data_Sheet_1.pdf]

## Supplemental Tables for

### The Beta Subunit of Non-Bifurcating NADH-Dependent [FeFe]-Hydrogenases Differ from Those of Multimeric Electron-Bifurcating [FeFe]-Hydrogenases

Nathaniel A. Losey, Saroj Poudel, Eric S. Boyd, and Michael J. McInerney

**Table S1. Beta Subunits from Group 2 Trimeric [FeFe]-Hydrogenases.** Sequences highlighted in blue have the criteria proposed for solely NADH-dependent, non-BF activity while those in black have the proposed criteria for BF activity. Sequences in orange have only 2 of 3 BF criteria.

| Organism                                          | Genbank ID   | # of AA Residues | Residue at NADH site 1 (TmHydB residue #232) | Residue at NADH site 2 (TmHydB residue #234) | Residue at FMN site (~TmHydB residue #312) | Residues at GGPSG motif site (TmHydB residue #427-#431) |
|---------------------------------------------------|--------------|------------------|----------------------------------------------|----------------------------------------------|--------------------------------------------|---------------------------------------------------------|
| <i>Spirochaeta thermophila</i> DSM 6192           | YP_003873857 | 418              | T                                            | K                                            | Y                                          | GGTAG                                                   |
| <i>Halothermothrix orenii</i> H 168               | YP_002508053 | 408              | T                                            | K                                            | Y                                          | GGIST                                                   |
| <i>Halanaerobium hydrogeniformans</i>             | YP_003995542 | 410              | T                                            | K                                            | Y                                          | GGVST                                                   |
| <i>Marinitoga piezophila</i> KA3                  | AEX85426     | 402              | T                                            | K                                            | Y                                          | GGIAT                                                   |
| <i>Petrotoga mobilis</i> SJ95                     | YP_001568191 | 404              | T                                            | K                                            | Y                                          | GGIST                                                   |
| <i>Ignavibacterium album</i> JCM 16511            | YP_005845236 | 409              | T                                            | K                                            | Y                                          | GGASG                                                   |
| <i>Syntrophobotulus glycolicus</i> DSM 8271       | YP_004267185 | 427              | T                                            | K                                            | Y                                          | GGSSG                                                   |
| <i>Desulfitobacterium dehalogenans</i> ATCC 51507 | AFL99064     | 431              | T                                            | K                                            | Y                                          | GGSSG                                                   |
| <i>Ruminiclostridium papyrosolvans</i> DSM 2782   | EGD46501     | 429              | T                                            | K                                            | Y                                          | GGSSG                                                   |

|                                                                     |              |      |   |   |   |       |
|---------------------------------------------------------------------|--------------|------|---|---|---|-------|
| <i>Clostridium</i> sp. BNL1100                                      | AEY65021     | 429  | T | K | Y | GGSSG |
| <i>Selenomonas ruminantium</i><br>subsp. <i>lactilytica</i> TAM6421 | YP_005434366 | 416  | T | K | Y | GGASG |
| <i>Selenomonas sputigena</i>                                        | WP_006191643 | 416  | T | K | Y | GGASG |
| <i>Dehalobacter restrictus</i><br>DSM 9455                          | AHF10703     | 425  | T | K | Y | GGASG |
| <i>Dehalobacter</i> sp. DCA                                         | AFV02665     | 425  | T | K | Y | GGASG |
| <i>Mahella australiensis</i> 50-1<br>BON                            | AEE96575     | 434  | T | K | Y | GGASG |
| <i>Dehalococcoides mccartyi</i><br>VS                               | YP_003329655 | 417  | T | K | Y | GGISS |
| <i>Dehalococcoides mccartyi</i><br>GY50                             | AHB12962     | 417  | T | K | Y | GGISS |
| <i>Dehalococcoides mccartyi</i><br>195                              | YP_180896    | 417  | T | K | Y | GGISS |
| <i>Dehalococcoides mccartyi</i><br>GT                               | YP_003461997 | 417  | T | K | Y | GGISS |
| <i>Dehalococcoides mccartyi</i><br>BTF08                            | AGG07215     | 417  | T | K | Y | GGISS |
| <i>Dehalococcoides mccartyi</i><br>CBDB1                            | YP_307337    | 417  | T | K | Y | GGISS |
| <i>Dehalococcoides mccartyi</i><br>DCMB5                            | AGG05801     | 417  | T | K | Y | GGISS |
| <i>Dehalococcoides mccartyi</i><br>BAV1                             | YP_001213692 | 417  | T | K | Y | GGISS |
| <i>Syntrophothermus</i><br><i>lipocalidus</i> DSM 12680             | YP_003701489 | 407  | T | K | Y | GGTSG |
| <i>Sphaerochaeta pleomorpha</i><br>str. Grapes                      | AEV28062     | 1050 | A | M | F | GGPSG |
| <i>Sphaerochaeta globosa</i> str.<br>Buddy                          | ADY13418     | 1050 | A | M | F | GGPSG |
| <i>Halobacteroides halobius</i><br>DSM 5150                         | AGB40371     | 600  | A | M | F | GGPSG |

|                                                             |              |      |   |   |   |       |
|-------------------------------------------------------------|--------------|------|---|---|---|-------|
| <i>Acetohalobium arabaticum</i><br>DSM 5501                 | YP_003828452 | 600  | A | M | F | GGPSG |
| <i>Halothermothrix orenii</i> H<br>168                      | YP_002508384 | 594  | A | M | F | GGPSG |
| <i>Desulfotomaculum ruminis</i><br>DSM 2154                 | YP_004544087 | 645  | A | M | F | GGPSG |
| <i>Desulfotomaculum</i><br><i>acetoxidans</i> DSM 771       | YP_003193157 | 677  | A | M | F | GGPSG |
| <i>Pelotomaculum</i><br><i>thermopropionicum</i> SI         | YP_001211928 | 650  | A | M | F | GGPSG |
| <i>Symbiobacterium</i><br><i>thermophilum</i> IAM 14863     | YP_077034    | 618  | A | M | F | GGPSG |
| <i>Moorella thermoacetica</i><br>ATCC 39073                 | YP_430563    | 619  | A | M | F | GGPSG |
| <i>Desulfotomaculum ruminis</i>                             | YP_004545924 | 569  | A | M | F | GGPSG |
| <i>Desulfotomaculum</i><br><i>nigrificans</i> CO-1-SRB      | AEF94085     | 569  | A | M | F | GGPSG |
| <i>Desulfotomaculum reducens</i><br>MI-1                    | YP_001113005 | 569  | A | M | F | GGPSG |
| Candidatus <i>Desulforudis</i><br><i>audaxviator</i> MP104C | YP_001717479 | 572  | A | M | F | GGPSG |
| <i>Pelotomaculum</i><br><i>thermopropionicum</i> SI         | YP_001212561 | 551  | A | M | F | GGPSG |
| <i>Syntrophobacter</i><br><i>fumaroxidans</i> MPOB          | YP_844977    | 572  | A | M | F | GGPSG |
| <i>Dehalobacter restrictus</i><br>DSM 9455                  | AHF10171     | 1028 | A | M | F | GGPSG |
| <i>Dehalobacter</i> sp. DCA                                 | AFV01902     | 1028 | A | M | F | GGPSG |
| <i>Spirochaeta africana</i> DSM<br>8902                     | AFG37808     | 1063 | A | M | F | GGPSG |
| <i>Spirochaeta smaragdinae</i><br>DSM 11293                 | YP_003802216 | 1040 | A | M | F | GGPSG |
| <i>Opitutus terrae</i> PB90-1                               | YP_001818429 | 668  | A | M | F | GGPSG |

|                                                           |              |     |   |   |   |       |
|-----------------------------------------------------------|--------------|-----|---|---|---|-------|
| <i>Turneriella parva</i> DSM<br>21527                     | AFM13385     | 610 | A | M | Y | GGPSG |
| <i>Elusimicrobium minutum</i><br>Pei191                   | ACC98087     | 620 | A | M | F | GGPSG |
| <i>Treponema primitia</i> ZAS-2                           | YP_004529576 | 624 | A | M | F | GGPSG |
| <i>Brachyspira hyodysenteriae</i><br>WA1                  | YP_002722660 | 562 | A | M | F | GGPSG |
| <i>Brachyspira intermedia</i><br>PWS/A                    | AEM21356     | 562 | A | M | F | GGPSG |
| <i>Brachyspira murdochii</i><br>DSM 12563                 | YP_003634434 | 562 | A | M | F | GGPSG |
| <i>Ruminococcus albus</i> 7 DSM<br>20455                  | YP_004106065 | 630 | A | M | F | GGPSG |
| <i>Bacteroides</i><br><i>thetaiotaomicron</i> VPI-5482    | NP_809038    | 635 | A | M | F | GGPSG |
| <i>Bacteroides xylanisolvens</i><br>XB1A                  | CBK69049     | 635 | A | M | F | GGPSG |
| <i>Sebaldella termitidis</i> ATCC<br>33386                | YP_003307428 | 614 | A | M | F | GGPSG |
| <i>Sebaldella termitidis</i> ATCC<br>33386                | YP_003310365 | 614 | A | M | F | GGPSG |
| <i>Ilyobacter polytropus</i> DSM<br>2926                  | YP_003966825 | 598 | A | M | F | GGPSG |
| <i>Ruminiclostridium</i><br><i>papyrosolvens</i> DSM 2782 | EGD48368     | 575 | A | M | F | GGPSG |
| <i>Desulfotomaculum reducens</i><br>MI-1                  | YP_001114616 | 575 | A | M | F | GGPSG |
| <i>Clostridium ljungdahlii</i><br>DSM 13528               | YP_003779641 | 626 | A | M | F | GGPSG |
| <i>Clostridium</i><br><i>autoethanogenum</i> DSM<br>10061 | AGY77773     | 626 | A | M | F | GGPSG |

|                                                    |              |     |   |   |   |       |
|----------------------------------------------------|--------------|-----|---|---|---|-------|
| <i>Clostridium botulinum</i> A str.<br>ATCC 3502   | YP_001254349 | 631 | A | M | F | GGPSG |
| <i>Clostridium botulinum</i> A str.<br>ATCC 19397  | YP_001384106 | 631 | A | M | F | GGPSG |
| <i>Clostridium botulinum</i> A str.<br>Hall        | YP_001387646 | 631 | A | M | F | GGPSG |
| <i>Clostridium botulinum</i><br>H04402 065         | CBZ03652     | 631 | A | M | F | GGPSG |
| <i>Clostridium botulinum</i> B1<br>str. Okra       | YP_001781396 | 631 | A | M | F | GGPSG |
| <i>Clostridium botulinum</i> A3<br>str. Loch Maree | YP_001787173 | 631 | A | M | F | GGPSG |
| <i>Clostridium botulinum</i> F str.<br>Langeland   | YP_001391108 | 631 | A | M | F | GGPSG |
| <i>Clostridium botulinum</i> F str.<br>230613      | ADF99531     | 631 | A | M | F | GGPSG |
| <i>Clostridium botulinum</i> A2<br>str. Kyoto      | YP_002804183 | 631 | A | M | F | GGPSG |
| <i>Clostridium botulinum</i> Ba4<br>str. 657       | YP_002862804 | 631 | A | M | F | GGPSG |
| <i>Clostridium cellulovorans</i><br>743B           | YP_003843747 | 630 | A | M | F | GGPSG |
| <i>Clostridium sticklandii</i>                     | YP_003935938 | 625 | A | M | F | GGPSG |
| <i>Clostridioides difficile</i> 630                | YP_001089926 | 628 | A | M | F | GGPSG |
| <i>Peptoclostridium difficile</i><br>CD196         | YP_003216196 | 628 | A | M | F | GGPSG |
| <i>Peptoclostridium difficile</i>                  | YP_003219703 | 628 | A | M | F | GGPSG |
| <i>Peptoclostridium difficile</i><br>BI1           | YP_006200432 | 628 | A | M | F | GGPSG |
| <i>Clostridiales</i> sp.                           | WP_003416938 | 628 | A | M | F | GGPSG |
| <i>Desulfosporosinus</i><br><i>acidiphilus</i> SJ4 | AFM39372     | 628 | A | M | F | GGPSG |

|                                                       |              |     |   |   |   |       |
|-------------------------------------------------------|--------------|-----|---|---|---|-------|
| <i>Desulfosporosinus orientis</i><br>DSM 765          | AET67216     | 628 | A | M | F | GGPSG |
| <i>Desulfosporosinus meridiei</i><br>DSM 13257        | AFQ42723     | 628 | A | M | F | GGPSG |
| <i>Desulfosporosinus acidiphilus</i> SJ4              | AFM43311     | 627 | A | M | F | GGPSG |
| <i>Desulfosporosinus meridiei</i><br>DSM 13257        | AFQ46172     | 627 | A | M | F | GGPSG |
| <i>Alkaliphilus oremlandii</i><br>OhILAs              | YP_001512472 | 635 | A | M | F | GGPSG |
| <i>Anaerococcus prevotii</i> DSM<br>20548             | YP_003152834 | 526 | A | M | F | GGPSG |
| <i>Clostridium ljungdahlii</i><br>DSM 13528           | YP_003778876 | 599 | A | M | F | GGPSG |
| <i>Clostridium autoethanogenum</i> DSM<br>10061       | AGY77002     | 599 | A | M | F | GGPSG |
| <i>Ruminiclostridium thermocellum</i> ATCC 27405      | YP_001036860 | 624 | A | M | F | GGPSG |
| <i>Clostridium lentocellum</i><br>DSM 5427            | YP_004308500 | 624 | A | M | F | GGPSG |
| <i>Clostridium saccharoperbutylaceticum</i> N1-4(HMT) | YP_007457382 | 624 | A | M | F | GGPSG |
| <i>Clostridium autoethanogenum</i> DSM<br>10061       | AGY75800     | 624 | A | M | F | GGPSG |
| <i>Treponema primitia</i> ZAS-2                       | YP_004529858 | 627 | A | M | F | GGPSG |
| <i>Treponema primitia</i> ZAS-2                       | YP_004529844 | 634 | A | M | F | GGPSG |
| <i>Ruminococcus</i> sp. 5 1<br>39BFAA                 | EES78091     | 623 | A | M | F | GGPSG |
| <i>Ruminococcus</i> sp. SR1/5                         | CBL19413     | 623 | A | M | F | GGPSG |
| <i>Blautia obeum</i> A2-162                           | CBL24111     | 623 | A | M | F | GGPSG |

|                                                      |              |     |   |   |   |       |
|------------------------------------------------------|--------------|-----|---|---|---|-------|
| <i>Ruminococcus torques</i> L2-14                    | CBL25630     | 622 | A | M | F | GGPSG |
| <i>Ruminiclostridium papyrosolvans</i> DSM 2782      | EGD49694     | 623 | A | M | F | GGPSG |
| <i>Clostridium</i> sp. BNL1100                       | AEY66910     | 623 | A | M | F | GGPSG |
| <i>Clostridium cellulolyticum</i> H10                | YP_002506621 | 623 | A | M | F | GGPSG |
| <i>Ethanoligenens harbinense</i> YUAN-3              | YP_004092839 | 624 | A | M | F | GGPSG |
| <i>Alkaliphilus oremlandii</i> OhILAs                | YP_001512532 | 623 | A | M | F | GGPSG |
| <i>Lachnoclostridium phytofermentans</i> ISDg        | YP_001557217 | 628 | A | M | F | GGPSG |
| <i>Clostridium beijerinckii</i> NCIMB 8052           | YP_001311177 | 626 | A | M | F | GGPSG |
| <i>Clostridium botulinum</i> B str. Eklund 17B (NRP) | YP_001886497 | 626 | A | M | F | GGPSG |
| <i>Clostridium botulinum</i> E3 str. Alaska E43      | YP_001921432 | 626 | A | M | F | GGPSG |
| <i>Oscillibacter valericigenes</i> Sjm18-20          | BAK98861     | 629 | A | M | F | GGPSG |
| <i>Fretibacterium fastidiosum</i>                    | CBL28840     | 628 | A | M | F | GGPSG |
| <i>Thermosediminibacter oceani</i> DSM 16646         | YP_003824933 | 625 | A | M | F | GGPSG |
| <i>Tepidanaerobacter acetatoxydans</i> Re1           | YP_004461912 | 625 | A | M | F | GGPSG |
| <i>Desulfobulbus propionicus</i> DSM 2032            | YP_004195043 | 633 | A | M | F | GGPSG |
| <i>Pelobacter propionicus</i> DSM 2379               | YP_901163    | 570 | A | M | F | GGPSG |
| <i>Desulfovibrio magneticus</i> RS-1                 | YP_002952161 | 629 | A | M | F | GGPSG |

|                                                        |              |     |   |   |   |       |
|--------------------------------------------------------|--------------|-----|---|---|---|-------|
| <i>Spirochaeta smaragdinae</i><br>DSM 11293            | YP_003802104 | 632 | A | M | F | GGPSG |
| <i>Melioribacter roseus</i> P3M-2                      | AFN73878     | 634 | A | M | F | GGPSG |
| <i>Halothermothrix orenii</i> H<br>168                 | YP_002507937 | 624 | A | M | F | GGPSG |
| <i>Desulfotomaculum ruminis</i><br>DSM 2154            | YP_004545920 | 626 | A | M | F | GGPSG |
| <i>Desulfotomaculum reducens</i><br>MI-1               | YP_001113008 | 627 | A | M | F | GGPSG |
| <i>Desulfotomaculum</i><br><i>nigrificans</i> CO-1-SRB | AEF94091     | 627 | A | M | F | GGPSG |
| <i>Desulfotomaculum</i><br><i>kuznetsovii</i> DSM 6115 | YP_004518296 | 626 | A | M | F | GGPSG |
| <i>Desulfallas gibsoniae</i> DSM<br>7213               | AGL02551     | 626 | A | M | F | GGPSG |
| <i>Fervidobacterium</i><br><i>pennivorans</i> DSM 9078 | AFG34975     | 634 | A | M | F | GGPSG |
| <i>Fervidobacterium nodosum</i><br>Rt17-B1             | YP_001409750 | 632 | A | M | F | GGPSG |
| <i>Pseudothermotoga</i><br><i>thermarum</i> DSM 5069   | AEH50204     | 625 | A | M | F | GGPSG |
| <i>Thermosipho africanus</i><br>TCF52B                 | YP_002334589 | 624 | A | M | F | GGPSG |
| <i>Thermosipho melanesiensis</i><br>BI429              | YP_001305743 | 623 | A | M | F | GGPSG |
| <i>Dictyoglomus thermophilum</i><br>H-6-12             | YP_002250293 | 624 | A | M | F | GGPSG |
| <i>Dictyoglomus turgidum</i><br>DSM 6724               | YP_002352463 | 624 | A | M | F | GGPSG |
| <i>Pseudothermotoga elfii</i>                          | WP_028843228 | 626 | A | M | F | GGPSG |
| <i>Thermotoga lettingae</i> TMO                        | YP_001470583 | 626 | A | M | F | GGPSG |
| <i>Thermotoga maritima</i><br>MSB8                     | NP_229225    | 626 | A | M | F | GGPSG |

|                                           |              |     |   |   |   |       |
|-------------------------------------------|--------------|-----|---|---|---|-------|
| <i>Thermotoga</i> sp. RQ2                 | YP_001739345 | 626 | A | M | F | GGPSG |
| <i>Thermotoga petrophila</i><br>RKU-1     | YP_001244958 | 626 | A | M | F | GGPSG |
| <i>Thermotoga naphthophila</i><br>RKU-10  | YP_003346883 | 626 | A | M | F | GGPSR |
| <i>Thermotoga neapolitana</i><br>DSM 4359 | YP_002534610 | 626 | A | M | F | GGPSG |
| <i>Melioribacter roseus</i> P3M-2         | AFN75711     | 661 | A | M | F | GGPSG |
| <i>Ignavibacterium album</i> JCM<br>16511 | YP_005845510 | 661 | A | M | F | GGPSG |

---

**Table S2. Beta Subunits from Group 3 Tetrameric [FeFe]-Hydrogenases.**

Sequences highlighted in blue have the criteria proposed for non-BF NADH-dependent activity while those in black have the criteria for BF activity.

| Organism                                                     | Genbank ID   | # of AA Residues | Residue at NADH site 1 (TmHydB residue #232) | Residue at NADH site 2 (TmHydB residue #234) | Residue at FMN site (~TmHydB residue #312) | Residues at GGPSG motif site (TmHydB residue #427-#431) |
|--------------------------------------------------------------|--------------|------------------|----------------------------------------------|----------------------------------------------|--------------------------------------------|---------------------------------------------------------|
| <i>Candidatus Cloacimonas acidaminovorans</i> str. Evry      | YP_001741249 | 520              | T                                            | K                                            | Y                                          | GGAAG                                                   |
| <i>Acetobacterium woodii</i> DSM 1030                        | AFA49451     | 599              | A                                            | M                                            | F                                          | GGPSG                                                   |
| <i>Caldicellulosiruptor obsidiansis</i> OB47                 | YP_003840537 | 598              | A                                            | M                                            | F                                          | GGPSG                                                   |
| <i>Caldicellulosiruptor hydrothermalis</i> 108               | YP_003992514 | 598              | A                                            | M                                            | F                                          | GGPSG                                                   |
| <i>Caldicellulosiruptor kronotskyensis</i> 2002              | YP_004024078 | 598              | A                                            | M                                            | F                                          | GGPSG                                                   |
| <i>Clostridium</i> sp. SY8519                                | YP_004709436 | 595              | A                                            | M                                            | F                                          | GGPSG                                                   |
| <i>Halanaerobium hydrogeniformans</i>                        | YP_003995635 | 600              | A                                            | M                                            | F                                          | GGPSG                                                   |
| <i>Halanaerobium praevalens</i> DSM 2228                     | ADO77754     | 601              | A                                            | M                                            | F                                          | GGPSG                                                   |
| <i>Spirochaeta thermophila</i> DSM 6578                      | AEJ61771     | 595              | A                                            | M                                            | F                                          | GGPSG                                                   |
| <i>Thermoanaerobacter</i> sp. X514                           | YP_001663747 | 596              | A                                            | M                                            | F                                          | GGPSG                                                   |
| <i>Thermoanaerobacter pseudethanolicus</i> ATCC 33223        | YP_001665443 | 596              | A                                            | M                                            | F                                          | GGPSG                                                   |
| <i>Thermoanaerobacter brockii</i> subsp. <i>finnii</i> Ako-1 | YP_004186441 | 596              | A                                            | M                                            | F                                          | GGPSG                                                   |
| <i>Tepidanaerobacter acetatoxydans</i> Re1                   | YP_004461325 | 597              | A                                            | M                                            | F                                          | GGPSG                                                   |

|                                                          |              |     |   |   |   |       |
|----------------------------------------------------------|--------------|-----|---|---|---|-------|
| <i>Thermoanaerobacterium xylanolyticum</i> LX-11         | YP_004471284 | 596 | A | M | F | GGPSG |
| <i>Thermoanaerobacterium saccharolyticum</i> JW/SL-YS485 | AFK87131     | 596 | A | M | F | GGPSG |
| <i>Treponema caldarium</i> DSM 7334                      | AEJ20870     | 596 | A | M | F | GGPSG |
| <i>Spirochaeta thermophila</i> DSM 6192                  | YP_003874588 | 595 | A | M | F | GGPSG |
| <i>Clostridium cellulolyticum</i> H10                    | YP_002506555 | 597 | A | M | F | GGPSG |
| <i>Clostridium</i> sp. BNL1100                           | AEY66838     | 597 | A | M | F | GGPSG |
| <i>Halobacteroides halobius</i> DSM 5150                 | AGB42160     | 600 | A | M | F | GGPSG |
| <i>Spirochaeta smaragdinae</i> DSM 11293                 | YP_003805368 | 595 | A | M | F | GGPSG |
| <i>Sphaerochaeta globosa</i> str. Buddy                  | ADY14132     | 595 | A | M | F | GGPSG |
| <i>Treponema azotonutricium</i> ZAS-9                    | YP_004528210 | 601 | A | M | F | GGPSG |
| <i>Desulfotomaculum acetoxidans</i> DSM 771              | YP_003189751 | 597 | A | M | F | GGPSG |
| <i>Desulfotomaculum kuznetsovii</i> DSM 6115             | YP_004517645 | 597 | A | M | F | GGPSG |
| <i>Dethiobacter alkaliphilus</i> AHT 1                   | EEG77317     | 597 | A | M | F | GGPSG |
| <i>Alkaliphilus metalliredigens</i> QYMF                 | YP_001321848 | 596 | A | M | F | GGPSG |
| <i>Marinitoga piezophila</i> KA3                         | AEX86275     | 596 | A | M | F | GGPSG |
| <i>Dehalobacter restrictus</i> DSM 9455                  | AHF10653     | 443 | A | M | F | GGPSG |
| <i>Dehalobacter</i> sp. DCA                              | AFV02616     | 443 | A | M | F | GGPSG |

|                                                                                   |              |     |   |   |   |       |
|-----------------------------------------------------------------------------------|--------------|-----|---|---|---|-------|
| <i>Pelobacter carbinolicus</i><br>DSM 2380                                        | YP_006717363 | 486 | A | M | F | GGPSG |
| <i>Petrotoga mobilis</i> SJ95                                                     | YP_001567771 | 485 | A | M | F | GGPSG |
| <i>Clostridium lentocellum</i><br>DSM 5427                                        | YP_004309300 | 595 | A | M | F | GGPSG |
| <i>Odoribacter splanchnicus</i><br>DSM 20712                                      | YP_004251474 | 596 | A | M | F | GGPSG |
| <i>Caldanaerobacter</i><br><i>subterraneus</i> subsp.<br><i>tengcongensis</i> MB4 | NP_622545    | 596 | A | M | F | GGPSG |
| <i>Caldicellulosiruptor</i><br><i>saccharolyticus</i> DSM<br>8903                 | YP_001180639 | 598 | A | M | F | GGPSG |
| <i>Caldicellulosiruptor bescii</i><br>DSM 6725                                    | YP_002573171 | 598 | A | M | F | GGPSG |
| <i>Caldicellulosiruptor</i><br><i>owensensis</i> OL                               | YP_004002452 | 598 | A | M | F | GGPSG |
| <i>Clostridium clariflavum</i><br>DSM 19732                                       | YP_005045888 | 597 | A | M | F | GGPSG |
| <i>Caldicellulosiruptor</i><br><i>kristjanssonii</i> I77R1B                       | YP_004026403 | 598 | A | M | F | GGPSG |
| <i>Caldicellulosiruptor</i><br><i>lactoaceticus</i> 6A                            | AEM73338     | 598 | A | M | F | GGPSG |
| <i>Ruminiclostridium</i><br><i>thermocellum</i> ATCC<br>27405                     | YP_001036772 | 597 | A | M | F | GGPSG |
| <i>Lachnoclostridium</i><br><i>phytofermentans</i> ISDg                           | YP_001560890 | 595 | A | M | F | GGPSG |
| <i>Coprothermobacter</i><br><i>proteolyticus</i> DSM 5265                         | YP_002246550 | 596 | A | M | F | GGPSG |
| <i>Clostridium</i><br><i>saccharolyticum</i> WM1                                  | YP_003823543 | 595 | A | M | F | GGPSG |

|                                                                     |              |     |   |   |   |       |
|---------------------------------------------------------------------|--------------|-----|---|---|---|-------|
| <i>Hungateiclostridium thermocellum</i>                             | WP_003512583 | 597 | A | M | F | GGPSG |
| <i>Ruminococcus champanellensis</i> 18P13 JCM 17042                 | CBL17695     | 597 | A | M | F | GGPSG |
| <i>Spirochaeta africana</i> DSM 8902                                | AFG38439     | 598 | A | M | F | GGPSG |
| <i>Salinispira pacifica</i>                                         | AHC13717     | 594 | A | M | F | GGPSG |
| <i>Eubacterium limosum</i> KIST612                                  | YP_003958823 | 599 | A | M | F | GGPSG |
| <i>Thermoanaerobacter italicus</i> Ab9                              | YP_003476669 | 596 | A | M | F | GGPSG |
| <i>Thermoanaerobacter mathranii</i> subsp. <i>mathranii</i> str. A3 | YP_003676615 | 596 | A | M | F | GGPSG |
| <i>Thermoanaerobacterium thermosaccharolyticum</i> DSM 571          | YP_003851723 | 596 | A | M | F | GGPSG |
| <i>Thermoanaerobacter</i> sp. X513                                  | YP_003903717 | 596 | A | M | F | GGPSG |
| <i>Thermoanaerobacter wiegelii</i> Rt8.B1                           | AEM78408     | 596 | A | M | F | GGPSG |
| <i>Thermoanaerobacterium thermosaccharolyticum</i> M0795            | YP_007298420 | 596 | A | M | F | GGPSG |
| <i>Mahella australiensis</i> 50-1 BON                               | AEE96447     | 597 | A | M | F | GGPSG |
| <i>Treponema brennaborensis</i> DSM 12168                           | YP_004438911 | 593 | A | M | F | GGPSG |
| <i>Thermosediminibacter oceani</i> DSM 16646                        | YP_003825088 | 597 | A | M | F | GGPSG |
| <i>Sphaerochaeta pleomorpha</i> str. Grapes                         | AEV30239     | 595 | A | M | F | GGPSG |

|                                                                                        |              |     |   |   |   |       |
|----------------------------------------------------------------------------------------|--------------|-----|---|---|---|-------|
| <i>Ruminiclostridium</i><br><i>papyrosolvens</i> DSM 2782                              | EGD49783     | 597 | A | M | F | GGPSG |
| <i>Thermoclostridium</i><br><i>stercorarium</i> subsp.<br><i>stercorarium</i> DSM 8532 | AGC67941     | 597 | A | M | F | GGPSG |
| <i>Alkaliphilus</i><br><i>metalliredigens</i> QYMF                                     | YP_001318524 | 547 | A | M | F | GGPSG |
| <i>Acetohalobium</i><br><i>arabaticum</i> DSM 5501                                     | YP_003826884 | 600 | A | M | F | GGPSG |
| <i>Desulfovibrio magneticus</i><br>RS-1                                                | YP_002951624 | 490 | A | M | F | GGPSG |
| <i>Geobacter</i> sp. M18                                                               | YP_004198597 | 489 | A | M | F | GGPSG |
| <i>Pelobacter carbinolicus</i><br>DSM 2380                                             | YP_006717332 | 486 | A | M | F | GGPSG |
| <i>Thermanaerovibrio</i><br><i>acidaminovorans</i> DSM<br>6589                         | YP_003316671 | 596 | A | M | F | GGPSG |
| <i>Treponema pedis</i> str. T A4                                                       | AGT43414     | 586 | A | M | F | GGPSG |
| <i>Parabacteroides</i><br><i>distasonis</i> ATCC 8503                                  | YP_001302431 | 596 | A | M | F | GGPSG |
| <i>Desulfobacterium</i><br><i>autotrophicum</i> HRM2                                   | YP_002602930 | 595 | A | M | F | GGPSG |
| <i>Desulfarculus baarsii</i><br>DSM 2075                                               | YP_003807481 | 596 | A | M | F | GGPSG |

---

**Table S3. Non-BF Beta Subunits from Genomes of Selected Syntrophic Metabolizers and from *Nyctotherus ovalis*.**

| Organism                                                              | Genbank ID   | # of AA Residues | Residue at NADH site 1 (TmHydB residue #232) | Residue at NADH site 2 (TmHydB residue #234) | Residue at FMN site (~TmHydB residue #312) | Residues at GGPSG motif site (TmHydB residue #427-#431) |
|-----------------------------------------------------------------------|--------------|------------------|----------------------------------------------|----------------------------------------------|--------------------------------------------|---------------------------------------------------------|
| <i>Nyctotherus ovalis</i>                                             | AAU14235     | 1198             | T                                            | K                                            | Y                                          | GGCTE                                                   |
| <i>Syntrophaceticus schinkii</i>                                      | WP_044664703 | 402              | T                                            | K                                            | Y                                          | GGNSG                                                   |
| <i>Syntrophomonas zehnderi</i> OL-4                                   | WP_046500148 | 407              | T                                            | K                                            | Y                                          | GGTSG                                                   |
| <i>Thermosyntropha lipolytica</i> DSM 11003                           | WP_073091112 | 407              | T                                            | K                                            | Y                                          | GGTSG                                                   |
| <i>Syntrophothermus lipocalidus</i> DSM 12680                         | WP_013174328 | 407              | T                                            | K                                            | Y                                          | GGTSG                                                   |
| <i>Syntrophomonas wolfei</i> subsp. <i>methylbutyratica</i> JCM 14075 | WP_061213711 | 407              | T                                            | K                                            | Y                                          | GGTSG                                                   |
| <i>Syntrophomonas palmitatica</i> JCM 14374                           | WP_054698037 | 407              | T                                            | K                                            | Y                                          | GGTSG                                                   |

**Table S4. Purification of [FeFe]-Hydrogenase, HydAB.**

| Fraction          | Protein (mg) | Specific Activity*                          | Total Activity*                          |
|-------------------|--------------|---------------------------------------------|------------------------------------------|
|                   |              | H <sub>2</sub> → MV <sub>ox</sub><br>(U/mg) | H <sub>2</sub> → MV <sub>ox</sub><br>(U) |
| Cell-free extract | 194          | 0.36                                        | 69.8                                     |
| HydAB Fraction    | 3.3          | 13                                          | 42.9                                     |

HydAB activity was followed by methyl viologen reduction with hydrogen as the electron donor at 37 °C and a pH of 7.5. One unit of activity (U) equals 2 μmoles of electrons transferred per min.

**Table S5. Peptides Detected by HPLC MS-MS Analysis of the Purified Recombinant HydAB Fraction.**

| SwissProt ID | Protein Description                                                                                 | Gene Name | Number of Matches to Gene Product | Protein Sequence Coverage (%) |
|--------------|-----------------------------------------------------------------------------------------------------|-----------|-----------------------------------|-------------------------------|
| Q2LSB7       | Iron only hydrogenase large subunit <i>Syntrophus aciditrophicus</i> (strain SB)                    | SYN_01370 | 805                               | 81.16                         |
| Q2LSB6       | NADH-quinone oxidoreductase chain F <i>Syntrophus aciditrophicus</i> (strain SB)                    | SYN_01369 | 840                               | 65.07                         |
| P0AG44       | 50S ribosomal protein L17 <i>Escherichia coli</i> (strain K12)                                      | rplQ      | 83                                | 40.16                         |
| P77398       | Bifunctional polymyxin resistance protein ArnA <i>Escherichia coli</i> (strain K12)                 | arnA      | 195                               | 36.67                         |
| P0A9A9       | Ferric uptake regulation protein <i>Escherichia coli</i> (strain K12)                               | fur       | 56                                | 41.22                         |
| P0ACJ8       | cAMP-activated global transcriptional regulator CRP <i>Escherichia coli</i> (strain K12)            | crp       | 107                               | 66.67                         |
| P17169       | Glutamine--fructose-6-phosphate aminotransferase [isomerizing] <i>Escherichia coli</i> (strain K12) | glmS      | 191                               | 48.77                         |
| P0A9K9       | FKBP-type peptidyl-prolyl cis-trans isomerase SlyD <i>Escherichia coli</i> (strain K12)             | slyD      | 109                               | 47.96                         |
| P0A7S9       | 30S ribosomal protein S13 <i>Escherichia coli</i> (strain K12)                                      | rpsM      | 36                                | 49.15                         |

|        |                                                                                  |           |    |       |
|--------|----------------------------------------------------------------------------------|-----------|----|-------|
| P00393 | NADH dehydrogenase <i>Escherichia coli</i> (strain K12)                          | ndh       | 89 | 35.94 |
| Q2LS97 | NADH-quinone oxidoreductase chain F <i>Syntrophus aciditrophicus</i> (strain SB) | SYN_02139 | 90 | 12.7  |
| P0CE47 | Elongation factor Tu 1 <i>Escherichia coli</i> (strain K12)                      | tufA      | 69 | 38.83 |
| P0CE48 | Elongation factor Tu 2 <i>Escherichia coli</i> (strain K12)                      | tufB      | 67 | 36.04 |
| P0A951 | Spermidine N(1)-acetyltransferase <i>Escherichia coli</i> (strain K12)           | speG      | 31 | 50.54 |
| P0A7V0 | 30S ribosomal protein S2 <i>Escherichia coli</i> (strain K12)                    | rpsB      | 56 | 30.71 |

---

**Table S6. Peptides Detected by HPLC MS-MS Analysis of of Partially Purified *S. aciditrophicus* Ferredoxin Fraction.**

| SwissProt ID | Protein Description                                                                               | Gene Name | Number of Matches to Gene Product | Protein Sequence Coverage (%) |
|--------------|---------------------------------------------------------------------------------------------------|-----------|-----------------------------------|-------------------------------|
| Q2LUB2_SYNAS | Ferredoxin <i>Syntrophus aciditrophicus</i> (strain SB)                                           | SYN_03059 | 24                                | 98.31                         |
| Q2LR25_SYNAS | DNA-binding protein HU <i>Syntrophus aciditrophicus</i> (strain SB)                               | SYN_01724 | 35                                | 27.47                         |
| ACP_SYNAS    | Acyl carrier protein <i>Syntrophus aciditrophicus</i> (strain SB)                                 | acpP      | 12                                | 11.25                         |
| Q2LU87_SYNAS | Hypothetical cytosolic protein <i>Syntrophus aciditrophicus</i> (strain SB)                       | SYN_02004 | 11                                | 13.98                         |
| Q2LSB7_SYNAS | Iron only hydrogenase large subunit <i>Syntrophus aciditrophicus</i> (strain SB)                  | SYN_01370 | 59                                | 21.32                         |
| Q2LWS6_SYNAS | Glycine cleavage system H protein <i>Syntrophus aciditrophicus</i> (strain SB)                    | gcvH      | 22                                | 16.28                         |
| Q2LSR6_SYNAS | Integration host factor beta-subunit <i>Syntrophus aciditrophicus</i> (strain SB)                 | SYN_03200 | 9                                 | 9.68                          |
| Q2LX26_SYNAS | Molybdenum transport regulatory protein_ lysR family <i>Syntrophus aciditrophicus</i> (strain SB) | SYN_01042 | 9                                 | 20.66                         |

|              |                                                                                                                                            |           |    |       |
|--------------|--------------------------------------------------------------------------------------------------------------------------------------------|-----------|----|-------|
| COAD_SYNAS   | Phosphopantetheine<br>adenylyltransferase <i>Syntrophus<br/>aciditrophicus</i> (strain SB)                                                 | coaD      | 15 | 13.33 |
| Q2LUY8_SYNAS | Acyl-CoA dehydrogenase_ short-<br>chain specific <i>Syntrophus<br/>aciditrophicus</i> (strain SB)                                          | SYN_00480 | 10 | 10.7  |
| Q2LXH8_SYNAS | ABC-type<br>nitrate/sulfonate/bicarbonate<br>transport systems_ periplasmic<br>components <i>Syntrophus<br/>aciditrophicus</i> (strain SB) | SYN_00365 | 15 | 10.33 |
| Q2LUY7_SYNAS | Glutaconyl-CoA decarboxylase A<br>subunit <i>Syntrophus aciditrophicus</i><br>(strain SB)                                                  | SYN_00481 | 15 | 7.97  |
| Q2LWR8_SYNAS | Acetyl-CoA synthetase <i>Syntrophus<br/>aciditrophicus</i> (strain SB)                                                                     | SYN_02635 | 20 | 9.91  |

---

**Table S7. Comparison of Cofactor-Binding Sites between BF [FeFe]-Hydrogenases and Formate Dehydrogenases and Homologous Non-BF NADH-Dependent Enzymes.**

Data are from cited references except in the case for the enzymes from *C. oxalaticus*, *M. trichosporum*, *M. extorquens*, *E. coli*, and *T. thermophilus* where conserved domains were from predictions obtained from the InterPro database.

SLBB domain is indicated in all listed enzymes, even if it was not noted in cited references. For molecular weights, the term sequence indicates that the molecular weight for each subunit was predicted from deduced amino acid sequence while SDS-PAGE indicates that the molecular weight was obtained from SDS-PAGE analysis. Number of iron-sulfur clusters is indicated by the number of clusters followed by “x” in front of the cluster designation.

| Source Organism                                                   | Literature Reference(s)                    | Protein Name | Alpha Subunit (Sequence Cofactors, Size)                       | Beta Subunit (Sequence Cofactors, Size)                                | Gamma Subunit (Sequence Cofactor, Size) | Additional Subunits (Sequence Cofactors, Size) | Genbank ID                                   |
|-------------------------------------------------------------------|--------------------------------------------|--------------|----------------------------------------------------------------|------------------------------------------------------------------------|-----------------------------------------|------------------------------------------------|----------------------------------------------|
| Electron-Bifurcating (BF)<br>Ferredoxin-Dependent, NADH-Dependent |                                            |              |                                                                |                                                                        |                                         |                                                |                                              |
| <i>T. maritima</i>                                                | Verhagen et al. 1999, Schut and Adams 2009 | HydABC       | HydA : 3 x [4Fe4S], 2 x [2Fe2S], 1 x [H] : 72.3 kDa (Sequence) | HydB : 3 x [4Fe4S], 1 x [2Fe2S], FMN, NADH, SLBB 68.7 kDa (Sequence)   | HydC : 1 x [2Fe2S] 18.0 kDa (Sequence)  |                                                | AAD36496<br>AAD36495<br>AAD36494             |
| <i>A. woodii</i>                                                  | Schuchman and Muller 2012                  | HydABCD      | HydA : 3 x [4Fe4S], 1 x [2Fe2S], 1 x [H] : 63.6 kDa (Sequence) | HydB : 3 x [4Fe4S], 1 x [2Fe2S], FMN, NADH, SLBB : 64.5 kDa (Sequence) | HydC : 1 X [2Fe2S] 14.1 kDa (Sequence)  | HydD : No Cofactors : 14.3 kDa (Sequenc)       | AFA49450<br>AFA49451<br>AFA49452<br>AFA49454 |
| <i>M. thermoacetica</i>                                           | Wang et al. 2013                           | HydABC       | HydA : 3 x [4Fe4S], 1 x [2Fe2S], 1 x                           | HydB : 3 x [4Fe4S], FMN, NADH,                                         | HydC : 1 X [2Fe2S] :                    |                                                | ABC20019<br>ABC20020<br>ABC20021             |

|                           |                   |                           |                                                                                              |                                                                                                            |                                                               |                                                                   |                                              |
|---------------------------|-------------------|---------------------------|----------------------------------------------------------------------------------------------|------------------------------------------------------------------------------------------------------------|---------------------------------------------------------------|-------------------------------------------------------------------|----------------------------------------------|
| <i>R. albus</i>           | Zheng et al. 2014 | HydABC                    | [H] : 67 kDa<br>(Sequence)<br><br>HydA : 3 x<br>[4Fe4S], 1 x<br>[2Fe2S], 1 x<br>[H] : 64 kDa | SLBB : 63<br>kDa<br>(Sequence)<br>HydB : 3 x<br>[4Fe4S], 1 x<br>[2Fe2S],<br>FMN, NADH,<br>SLBB : 68<br>kDa | 17 kDa<br>(Sequence)<br><br>HydC : 1 X<br>[2Fe2S] :<br>18 kDa |                                                                   | ADU23430<br>ADU23431<br>ADU23432             |
| <i>C. tengcongensis</i>   | Soboh et al. 2004 | HydABCD                   | HydA : 3 x<br>[4Fe4S], 1 x<br>[2Fe2S], 1 x<br>[H] : 64 kDa<br>(SDS-<br>PAGE)                 | HydB : 3 x<br>[4Fe4S], 1 x<br>[2Fe2S],<br>FMN, NADH,<br>SLBB : 65<br>kDa (SDS-<br>PAGE)                    | HydC : 1 X<br>[2Fe2S] :<br>20 kDa<br>(SDS-<br>PAGE)           | HydD: No<br>Cofactors :<br>14.1 kDa<br>(SDS-PAGE)                 | AAM24150<br>AAM24149<br>AAM24148             |
| <i>C. acidurici</i>       | Wang et al. 2013  | HylABC<br>FdhF2           | FdhF2 : 4 x<br>[4Fe4S], 1 x<br>[2Fe2S], 1 x<br>Mo Sec :<br>99.0 kDa<br>(Sequence)            | HylB : 3 x<br>[4Fe4S], 1 x<br>[2Fe2S],<br>FMN, NADH,<br>SLBB : 68.0<br>kDa<br>(Sequence)                   | HylC : : 1<br>X [2Fe2S] :<br>18.4 kDa<br>(Sequence)           | HylA : 4 x<br>[4Fe4S], 2 x<br>[2Fe2S] : 35.9<br>kDa<br>(Sequence) | AFS79904<br>AFS79905<br>AFS79906<br>AFS79907 |
| <i>D. fructosovorans</i>  | Kpebe et al. 2018 | HndABCD                   | HndD : 3 x<br>[4Fe4S], 1 x<br>[2Fe2S], 1 x<br>[H] : 64 kDa<br>(SDS-<br>PAGE)                 | HndC : 3 x<br>[4Fe4S],<br>FMN, NADH,<br>SLBB (Flavin)<br>: 57 kDa<br>(SDS-PAGE)                            | HndA : 1 X<br>[2Fe2S] :<br>19 kDa<br>(SDS-<br>PAGE)           | HndB : 1 X<br>[2Fe2S] : 14<br>kDa (SDS-<br>PAGE)                  | AAA87057<br>AAA87056<br>AAA87054<br>AAA87055 |
| <i>C. autoethangeneum</i> | Wang et al. 2013  | FdhA<br>HytABCD<br>HytE12 | FdhA : 1 x<br>[4Fe4S], 1 x<br>Mo Sec :                                                       | HytB : 3 x<br>[4Fe4S], 1 x<br>[2Fe2S],<br>FMN, NADH,                                                       | HytC : : 1 X<br>[2Fe2S]<br>:18.1 kDa<br>(Sequence)            | HytA: 51.4<br>kDa<br>(Sequence)<br>HytC: 18.1                     | AGT29713<br>AGT29710<br>AGT29709<br>AGT29711 |

|                                                   |                                       |         |                                                                               |                                                                                    |                                                   |                                                                                                                                    |                                  |
|---------------------------------------------------|---------------------------------------|---------|-------------------------------------------------------------------------------|------------------------------------------------------------------------------------|---------------------------------------------------|------------------------------------------------------------------------------------------------------------------------------------|----------------------------------|
|                                                   |                                       |         | 78.8 kDa<br>(Sequence)                                                        | SLBB : 65.5<br>kDa<br>(Sequence)                                                   |                                                   | kDa<br>(Sequence)<br><br>HytD : 28.6<br>kDa<br>(Sequence)<br>HytE1 : 19.9<br>kDa<br>(Sequence)<br>HytE2: 20.1<br>kDa<br>(Sequence) | AGT29712<br>AGT29714<br>AGT29705 |
| <hr/>                                             |                                       |         |                                                                               |                                                                                    |                                                   |                                                                                                                                    |                                  |
| Not Bifurcating<br>(Non-BF)<br>NADH-<br>Dependent |                                       |         |                                                                               |                                                                                    |                                                   |                                                                                                                                    |                                  |
| <hr/>                                             |                                       |         |                                                                               |                                                                                    |                                                   |                                                                                                                                    |                                  |
| <i>S. wolfei</i>                                  | Losey et al.<br>2017                  | Hyd1ABC | HydA : 3 x<br>[4Fe4S], 1 x<br>[2Fe2S], 1 x<br>[H] : 63.0<br>kDa<br>(Sequence) | HydB : 1 x<br>[4Fe4S],<br>FMN, NADH,<br>SLBB (Flavin)<br>: 43.9 kDa<br>(Sequence)  | HydC : 1 x<br>[2Fe2S] :<br>17.5 kDa<br>(Sequence) |                                                                                                                                    | ABI68331<br>ABI68332<br>ABI68333 |
| <i>S. aciditrophicus</i>                          | This work                             | HydAB   | HydA : 3 x<br>[4Fe4S], 1 x<br>[2Fe2S], 1 x<br>[H] : 68.5<br>kDa<br>(Sequence) | HydB : 1 x<br>[4Fe4S], 1 x<br>[2Fe2S] FMN,<br>NADH, SLBB<br>(Flavin) : 66.0<br>kDa | Fused as<br>N-terminal<br>portion of<br>HydB      |                                                                                                                                    | ABC76974<br>ABC76975             |
| <i>R. capsulatus</i>                              | Hartmann<br>and<br>Leimkuhler<br>2013 | FdsABG  | FdsA : 4 x<br>[4Fe4S], 1 x<br>[2Fe2S], 1 x<br>Mo bis-<br>MGD : 105            | FdsB : 1 x<br>[4Fe4S],<br>FMN, NADH,<br>SLBB (Flavin)<br>: 45.0 kDa                | FdsG: 1 x<br>[2Fe2S] :<br>18.4 kDa<br>(Sequence)  |                                                                                                                                    | ADE86759<br>ADE86760<br>ADE86761 |

|                        |                                                |                        | kDa<br>(Sequence)                                                      |                                                                              |                                         |                            |                                                              |
|------------------------|------------------------------------------------|------------------------|------------------------------------------------------------------------|------------------------------------------------------------------------------|-----------------------------------------|----------------------------|--------------------------------------------------------------|
| <i>C. eutropha</i>     | Friedebold and Bowien 1993, Oh and Bowien 1998 | FdhABG                 | FdhA : 4 x [4Fe4S], 1 x [2Fe2S], 1 x Mo bis-MGD : 110.0 kDa (SDS-PAGE) | FdhB : 1 x [4Fe4S], FMN, NADH, SLBB (Flavin) : 57.0 kDa (SDS-PAGE)           | FdhG: 1 x [2Fe2S] : 11.6 kDa (SDS-PAGE) |                            | WP_011614623<br>WP_011614622<br>WP_011614621<br>WP_010811246 |
| <i>C. oxalaticus</i>   | Muller et al. 1977                             | FdhABG (CDs from seq)  | FdhA : 4 x [4Fe4S], 1 x [2Fe2S], 1 x Mo bis-MGD :                      | FdhB : 1 x [4Fe4S], FMN, NADH, SLBB (Flavin) :                               | FdhG: 1 x [2Fe2S] :                     |                            | WP_063236918<br>WP_063236917<br>WP_063236916<br>WP_063236919 |
| <i>M. trichosporum</i> | Jollie and Lipscomb 1993,                      | FdhABGD (CDs from seq) | FdhA : 4 x [4Fe4S], 1 x [2Fe2S], 1 x Mo bis-MGD : 98 kDa (SDS-PAGE)    | FdhB : 1 x [4Fe4S], FMN, NADH, SLBB (Flavin) : 56 kDa (SDS-PAGE)             | FdhG: 1 x [2Fe2S] : 20 kDa (SDS-PAGE)   | FdhD : 11.5 kDa (SDS-PAGE) | WP_003614381<br>WP_003614380<br>WP_003614379<br>WP_003613007 |
| <i>M. extorquens</i>   | Laukel et al. 2003                             | Fdh1AB (CDs from seq)  | FdhA : 4 x [4Fe4S], 1 x [2Fe2S], 1 x W bis-MGD : 105 kDa (SDS-PAGE)    | FdhB : 1 x [4Fe4S], 1 x [2Fe2S] FMN, NADH, SLBB (Flavin) : 60 kDa (SDS-PAGE) | Fused as N-terminal portion of FdhB     |                            | ACS42636<br>ACS42635                                         |
| <i>E. coli</i>         |                                                | NuoEFG (CDs from seq)  | NuoG : 3 x [4Fe4S], 1 x [2Fe2S] :                                      | NuoF : 1 x [4Fe4S], FMN, NADH,                                               | NuoE: 1 x [2Fe2S] :                     |                            | NP_416786<br>NP_416787<br>NP_416788                          |

|                        |                             |                                         |                                                                                                            |                                  |
|------------------------|-----------------------------|-----------------------------------------|------------------------------------------------------------------------------------------------------------|----------------------------------|
| <i>T. thermophilus</i> | Nqo123<br>(CDs from<br>seq) | Nqo1 : 3 x<br>[4Fe4S], 1 x<br>[2Fe2S] : | SLBB (Flavin)<br>:<br>Nqo2 : 1 x<br>[4Fe4S],<br>FMN, NADH,<br>SLBB (Flavin)<br>:<br>Nqo3: 1 x<br>[2Fe2S] : | AAA97943<br>AAA97942<br>AAA97944 |
|------------------------|-----------------------------|-----------------------------------------|------------------------------------------------------------------------------------------------------------|----------------------------------|

---
